# Supplementary material
Source: publisher figshare collection journal article supplement (https://tandf.figshare.com/articles/dataset/_/7770275)
Supplement: Supplementary file 1 [file 1]

Supplementary Table 6. PCA Component Loadings for *DRD4* CpGs on

|            | First Component | Gene Location | Genome Location |
|------------|-----------------|---------------|-----------------|
| cg27433878 | 0.526           | 890 US*       | 636409          |
| cg14433983 | 0.653           | 1.13k US*     | 636460          |
| cg11335335 | 0.871           | I1            | 637885          |
| cg07212818 | 0.923           | I1*           | 638076          |
| cg03909863 | 0.905           | I1            | 638404          |
| cg05717871 | 0.950           | I1*           | 638507          |
| cg09386376 | 0.938           | I1*           | 638939          |
| cg16313227 | 0.923           | I1*           | 638974          |
| cg03855291 | 0.884           | I1*           | 639423          |
| cg09133032 | 0.681           | E3            | 640094          |

\*Opposite strand; US = Upstream; DS = Downstream; I = Intron; E = Exon
