# Supplementary material
Source: publisher figshare collection journal article supplement (https://tandf.figshare.com/articles/dataset/_/7770275)
Supplement: Supplementary file 2 [file 1]

Supplementary Table 4. PCA Component Loadings for *DRD1* CpGs on Chromosome 5

|            | First Component | Second Component | Gene Location | Genome Location |
|------------|-----------------|------------------|---------------|-----------------|
| cg15386372 | -0.419          | 0.005            | 222k DS*      | 174646125       |
| cg02347535 | -0.569          | 0.611            | 198k DS       | 174670676       |
| cg26113233 | 0.350           | -0.141           | 195k DS*      | 174673622       |
| cg19807286 | 0.484           | 0.096            | 188k DS       | 174680743       |
| cg04858453 | -0.431          | 0.217            | 171k DS       | 174697402       |
| cg11394338 | 0.933           | 0.194            | 153k DS       | 174715295       |
| cg01804539 | 0.877           | 0.322            | 153k DS       | 174715614       |
| cg12881268 | -0.649          | 0.610            | 103k DS*      | 174764838       |
| cg23504814 | 0.835           | 0.152            | 98.24k DS*    | 174770526       |
| cg23171103 | 0.694           | 0.438            | 97.30k DS     | 174771462       |
| cg13311794 | 0.717           | 0.039            | 94.47k DS     | 174774296       |
| cg17413750 | 0.347           | -0.575           | 54.69k DS     | 174814067       |
| cg16620160 | 0.557           | -0.047           | 43.68k DS*    | 174825074       |
| cg02536923 | 0.740           | -0.195           | 43.67k DS*    | 174825090       |
| cg16112129 | -0.440          | -0.174           | E1            | 174870968       |
| cg00698685 | 0.417           | -0.584           | 179 US*       | 174871341       |
| cg09656690 | -0.434          | -0.737           | 4.07k US*     | 174875230       |
| cg08265197 | -0.466          | 0.344            | 6.83k US*     | 174877995       |
| cg11459976 | 0.753           | 0.395            | 16.26k US     | 174887423       |

\*Opposite strand; US = Upstream; DS = Downstream; I = Intron; E = Exon
