# Supplementary material
Source: publisher figshare collection journal article supplement (https://tandf.figshare.com/articles/dataset/_/7770275)
Supplement: Supplementary file 3 [file 1]

Supplementary Table 3. PCA Component Loadings for *DAT1* CpGs on Chromosome 5

|            | First Component | Second Component | Gene Location | Genome Location |
|------------|-----------------|------------------|---------------|-----------------|
| cg23367112 | 0.835           | -0.040           | 23.92k DS*    | 1368989         |
| cg09786142 | 0.637           | 0.164            | 23.90k DS*    | 1369001         |
| cg17471033 | -0.596          | 0.676            | 21.16k DS*    | 1371741         |
| cg02579469 | 0.548           | 0.056            | 14.56k DS*    | 1378350         |
| cg11157525 | 0.606           | 0.233            | 14.40k DS*    | 1378503         |
| cg11431775 | 0.510           | 0.306            | 13.30k DS*    | 1379609         |
| cg21896800 | 0.455           | -0.260           | 12.95k DS     | 1379957         |
| cg08704623 | 0.542           | -0.138           | 12.87k DS     | 1380038         |
| cg06118021 | 0.866           | 0.063            | 12.72k DS     | 1380185         |
| cg08609839 | -0.517          | -0.126           | 12.29k DS*    | 1380611         |
| cg24767731 | -0.513          | -0.283           | 12.27k DS*    | 1380632         |
| cg20646359 | 0.618           | -0.046           | 10.38k DS     | 1382527         |
| cg04089814 | 0.635           | -0.057           | 7.65k DS      | 1385252         |
| cg02619599 | 0.858           | 0.256            | 7.27k DS*     | 1385632         |
| cg03016700 | -0.337          | -0.382           | 6.95k DS      | 1385959         |
| cg08717980 | 0.468           | 0.217            | 6.90k DS*     | 1386005         |
| cg08391942 | 0.556           | 0.280            | 6.26k DS*     | 1386647         |
| cg11942971 | -0.508          | 0.218            | 6.16k DS*     | 1386742         |
| cg16567815 | -0.480          | -0.014           | 6.02k DS*     | 1386887         |
| cg22182137 | 0.741           | 0.080            | 2.67k DS*     | 1390235         |
| cg16530632 | -0.536          | 0.748            | 836 DS*       | 1392069         |
| cg10838500 | -0.455          | 0.154            | E15 (UTR)     | 1393877         |
| cg19728345 | -0.408          | -0.803           | E15 (UTR)     | 1394320         |
| cg26924408 | -0.753          | 0.503            | E15 (UTR)     | 1394484         |
| cg14879948 | -0.768          | 0.130            | E15 (UTR)*    | 1394576         |
| cg21163347 | -0.507          | 0.747            | E15 (UTR)     | 1394633         |
| cg22708635 | -0.409          | 0.115            | I14*          | 1395355         |
| cg20471798 | 0.422           | 0.720            | I12*          | 1405330         |
| cg00232679 | -0.553          | 0.563            | I12*          | 1405588         |
| cg06033040 | -0.437          | 0.677            | I12*          | 1405601         |
| cg17999358 | 0.579           | 0.187            | I12           | 1405774         |
| cg24756227 | -0.620          | 0.181            | I12*          | 1406177         |
| cg26269038 | 0.660           | 0.283            | E12*          | 1406365         |
| cg14994247 | -0.494          | 0.404            | I11           | 1407005         |
| cg09892121 | -0.408          | -0.058           | I11           | 1407319         |
| cg15999077 | 0.367           | 0.405            | I11*          | 1407523         |
| cg22891413 | -0.495          | 0.085            | I11*          | 1407569         |
| cg16772793 | 0.315           | 0.333            | I9            | 1410156         |
| cg17377433 | -0.567          | 0.429            | I8            | 1413138         |
| cg05124260 | -0.522          | 0.283            | I8*           | 1413928         |
| cg14765933 | -0.405          | 0.329            | E8*           | 1414924         |
| cg02929434 | 0.567           | 0.524            | I7            | 1415533         |
| cg08943004 | -0.460          | 0.000            | I6*           | 1416873         |

|            |        |        |           |         |
|------------|--------|--------|-----------|---------|
| cg07525751 | 0.532  | 0.296  | I6*       | 1416958 |
| cg09691393 | 0.585  | 0.108  | I6*       | 1417003 |
| cg11234429 | 0.441  | 0.210  | I6*       | 1417706 |
| cg14506366 | 0.372  | -0.073 | I4*       | 1430421 |
| cg11616777 | 0.647  | -0.245 | I4        | 1431115 |
| cg19440506 | 0.696  | 0.223  | I4        | 1431238 |
| cg12516187 | -0.505 | 0.407  | I3*       | 1438168 |
| cg05232496 | 0.463  | 0.374  | I3        | 1438225 |
| cg12848639 | 0.785  | -0.074 | I3        | 1438375 |
| cg27580375 | 0.668  | 0.045  | I3*       | 1438391 |
| cg16526509 | 0.525  | 0.463  | I3*       | 1439208 |
| cg03901281 | 0.575  | 0.343  | I2        | 1441675 |
| cg12484332 | 0.777  | -0.116 | I1*       | 1443819 |
| cg00997378 | 0.804  | 0.285  | I1        | 1444260 |
| cg08713711 | -0.559 | 0.361  | I1        | 1444333 |
| cg15212349 | 0.588  | 0.156  | I1*       | 1444852 |
| cg26205131 | -0.553 | -0.061 | I1*       | 1444878 |
| cg04598517 | -0.583 | 0.105  | E1 (UTR)* | 1445542 |
| cg27037018 | -0.544 | 0.052  | 24 US*    | 1445567 |
| cg16180821 | 0.702  | 0.222  | 1.43k US  | 1446969 |

---

\*Opposite strand; US = Upstream; DS = Downstream; I = Intron; E = Exon

---
