# Supplementary material
Source: publisher figshare collection journal article supplement (https://tandf.figshare.com/articles/dataset/_/7770275)
Supplement: Supplementary file 4 [file 1]

Supplementary Table 1. PCA Component Loadings for *COMT* CpGs on Chromosome

|            | First Component | Second Component | Gene Location | Genome Location |
|------------|-----------------|------------------|---------------|-----------------|
| cg08825848 | 0.551           | -0.181           | I1            | 19930802        |
| cg16834011 | -0.765          | -0.089           | I1*           | 19931790        |
| cg08289189 | -0.314          | 0.263            | I1            | 19937277        |
| cg14028877 | 0.595           | 0.198            | I1            | 19937281        |
| cg09926649 | -0.623          | 0.473            | I1*           | 19938096        |
| cg24914853 | -0.742          | 0.329            | I1*           | 19938136        |
| cg08730070 | -0.687          | 0.420            | I1            | 19938378        |
| cg27521571 | -0.448          | 0.724            | I1*           | 19938424        |
| cg13175282 | -0.317          | -0.011           | I1*           | 19938541        |
| cg10122187 | -0.386          | 0.544            | I1*           | 19938620        |
| cg18773129 | -0.302          | 0.156            | I1            | 19938916        |
| cg25836061 | 0.318           | -0.734           | I1*           | 19939028        |
| cg12746246 | -0.364          | 0.166            | I1            | 19941800        |
| cg26513451 | -0.340          | 0.676            | I1            | 19942505        |
| cg20709110 | 0.841           | 0.232            | I1*           | 19946873        |
| cg16097539 | 0.335           | 0.352            | I2*           | 19949448        |
| cg11361387 | 0.918           | 0.329            | I2            | 19949873        |
| cg07579946 | 0.972           | 0.041            | I2            | 19949893        |
| cg04856117 | 0.968           | 0.090            | I2            | 19949901        |
| cg06346307 | 0.963           | 0.115            | I2*           | 19949965        |
| cg22546130 | 0.937           | -0.018           | I2*           | 19950026        |
| cg23601416 | 0.870           | 0.334            | I2            | 19950040        |
| cg01335087 | 0.961           | 0.119            | E3            | 19950166        |
| cg09914785 | 0.867           | -0.138           | I3*           | 19950733        |
| cg27449804 | 0.959           | 0.100            | E4*           | 19951181        |
| cg18731680 | -0.610          | -0.702           | I5            | 19953712        |
| cg19930203 | 0.492           | 0.568            | E6 (UTR)      | 19956281        |

\*Opposite strand; US = Upstream; DS = Downstream; I = Intron; E = Exon
