# Supplementary material
Source: publisher figshare collection journal article supplement (https://tandf.figshare.com/articles/dataset/_/7770275)
Supplement: Supplementary file 5 [file 1]

Supplementary Table 5. PCA Component Loadings for *DRD2* CpGs on Chromosome 11

|            | First Component | Second Component | Gene Location | Genome Location |
|------------|-----------------|------------------|---------------|-----------------|
| cg18184876 | -0.953          | 0.096            | 5.56k DS*     | 113275893       |
| cg25424123 | -0.914          | 0.208            | 5.55k DS*     | 113275903       |
| cg22196455 | -0.917          | 0.298            | 5.44k DS*     | 113276010       |
| cg15571053 | -0.796          | -0.345           | 2.25k DS      | 113279199       |
| cg21671386 | 0.527           | 0.394            | E8 (UTR)*     | 113280570       |
| cg18845001 | 0.466           | 0.642            | E7            | 113283595       |
| cg08948964 | 0.603           | 0.019            | I5            | 113285594       |
| cg18288412 | 0.394           | 0.223            | E3            | 113288784       |
| cg12813402 | 0.547           | 0.569            | I2*           | 113289635       |
| cg22404572 | 0.363           | -0.307           | I2            | 113289673       |
| cg26896904 | 0.481           | 0.517            | E2*           | 113295287       |
| cg25370012 | 0.397           | 0.387            | E2            | 113295295       |
| cg02198192 | 0.489           | 0.084            | E2 (UTR)      | 113295379       |
| cg01040156 | 0.376           | -0.358           | I1            | 113295698       |
| cg16845257 | 0.317           | 0.025            | I1            | 113295750       |
| cg14809166 | 0.631           | 0.151            | I1*           | 113296828       |
| cg16823554 | -0.916          | 0.256            | I1*           | 113300731       |
| cg00525373 | 0.801           | -0.043           | I1            | 113307871       |
| cg03608783 | -0.888          | 0.191            | I1            | 113317120       |
| cg25028849 | 0.831           | 0.000            | I1*           | 113318606       |
| cg03695081 | -0.937          | 0.035            | I1*           | 113319101       |
| cg15215799 | 0.590           | 0.686            | I1            | 113327896       |
| cg18248586 | 0.653           | -0.609           | I1            | 113329026       |
| cg02332042 | 0.670           | 0.563            | I1*           | 113330091       |
| cg10903994 | 0.555           | 0.431            | I1*           | 113340694       |
| cg06778429 | -0.403          | -0.367           | 175 US*       | 113346176       |
| cg21683009 | -0.408          | -0.483           | 182 US*       | 113346183       |
| cg12176709 | 0.329           | -0.428           | 484 US*       | 113346485       |
| cg22842860 | 0.571           | -0.694           | 2.18k US*     | 113348189       |
| cg20424531 | 0.755           | -0.492           | 2.24k US      | 113348237       |
| cg24868960 | 0.687           | 0.048            | 57.18k US*    | 113403184       |
| cg11318377 | 0.360           | -0.605           | 64.90k US*    | 113410896       |
| cg04387924 | 0.428           | 0.439            | 71.58k US     | 113417579       |
| cg09773238 | -0.892          | 0.272            | 78.21k US     | 113424208       |
| cg22889887 | -0.936          | 0.166            | 87.93k US     | 113433931       |
| cg19822215 | -0.829          | 0.161            | 88.61k US     | 113434606       |

\*Opposite strand; US = Upstream; DS = Downstream; I = Intron; E = Exon
