# Supplementary material
Source: publisher figshare collection journal article supplement (https://tandf.figshare.com/articles/dataset/_/7770275)
Supplement: Supplementary file 6 [file 1]

Supplementary Table 2. PCA Component Loadings for *DBH* CpGs on Chromosome 9

|                                                                        | First Component | Second Component | Gene Location | Genome Location |
|------------------------------------------------------------------------|-----------------|------------------|---------------|-----------------|
| cg13649056                                                             | -0.319          | -0.523           | 26.86k US*    | 136474626       |
| cg06524834                                                             | 0.330           | -0.474           | 22.65k US*    | 136479183       |
| cg16056702                                                             | 0.879           | -0.091           | 25.26k US     | 136479705       |
| cg04671100                                                             | 0.361           | -0.162           | 11.85k US*    | 136493259       |
| cg10337957                                                             | -0.370          | 0.730            | 10.85k US     | 136496482       |
| cg15709714                                                             | 0.720           | 0.053            | 10.21k US*    | 136498328       |
| cg07490668                                                             | 0.495           | 0.074            | 9.28k US*     | 136498308       |
| cg25020204                                                             | 0.838           | 0.279            | 8.48k US      | 136500234       |
| cg11619181                                                             | -0.796          | 0.401            | 8.72k US      | 136500618       |
| cg06708731                                                             | 0.430           | 0.603            | 8.02k US      | 136501420       |
| cg22073402                                                             | 0.940           | 0.087            | I2            | 136506306       |
| cg00813126                                                             | 0.725           | 0.183            | I2            | 136506657       |
| cg24382884                                                             | 0.921           | -0.038           | E11           | 136522201       |
| cg07921702                                                             | 0.961           | 0.077            | I11           | 136522456       |
| cg13651137                                                             | 0.937           | -0.091           | I11           | 136522662       |
| cg14138047                                                             | 0.941           | -0.052           | I11           | 136522716       |
| cg01256850                                                             | -0.652          | -0.045           | 412 DS*       | 136524878       |
| *Opposite strand; US = Upstream; DS = Downstream; I = Intron; E = Exon |                 |                  |               |                 |
